# Supplementary material for: Protection effect of intracellular melanin from Lachnum YM156 and Haikunshenxi capsule combination on adenine-induced chronic renal failure in mice
Source: Royal Society of Chemistry journal article supplement (doi:10.1039/c6md00646a), 2017-01-01
Supplement: c6md00646a1.pdf [file c6md00646a1.pdf]

1 **Protection effect of intracellular melanin from *Lachnum* YM156 and**  
2 **Haikunshenxi capsule combination on adenine-induced chronic renal failure in**  
3 **mice**

4 **Shenglan Li,<sup>a</sup> Jinglei Li,<sup>a</sup> Fang Shi,<sup>a</sup> Liuqing Yang,<sup>a</sup> Ming Ye<sup>\*a</sup>**

5 <sup>a</sup> School of Food Science and Engineering, Hefei University of Technology, Hefei 230009, China

6

7 **Materials and methods**

8 **Preparation of LIM**

9 The fruiting bodies of *Lachnum* YM156 were collected from Yunnan Province, China. *Lachnum*  
10 YM156 was isolated and preserved in the Microbial Resource and Application Laboratory of the  
11 Hefei University of Technology. The intracellular melanin of *Lachnum* YM156 was fermented,  
12 extracted and purified according to the method of Ye et al. with slight modification.<sup>1</sup> The crude  
13 melanin was obtained by the method of alkali extraction and acid precipitation, then 15 mg  
14 extracted melanin were dissolved in 1 mL 0.5% NaHCO<sub>3</sub> solution for chromatography on  
15 sephadex G-15 column (1.6 cm × 60 cm), with 0.5% NaHCO<sub>3</sub> solution as eluant, injection volume  
16 of 1 mL and the flow rate of 200 L/min. The samples were sequentially collected with tube that  
17 each containing 5 mL. And the main component was collected.

18 **Reagents**

19 3-(4,5-Dimethylthiazol-2-yl)-2,5-diphenyltetrazolium bromide (MTT) was purchased from  
20 Biosharp (Anhui, China), phosphate buffered saline, fetal bovine serum, dulbecco's modified

21 eagle medium (DMEM) and penicillin-streptomycin solution were purchased from HyClone  
22 company (HyClone, USA). Adenine was provided by Luoyang Desheng Chemical Co.,Ltd.  
23 (Henan, China), Haikunshenxi capsules from Huinan ChanglongBiochemical Pharmacy Co., Ltd  
24 (Jilin, China), serum creatinine (SCR) kit, blood urea nitrogen (BUN) kit, total protein (TP) kit  
25 and albumin (ALB) kit were obtained from Nanjing Jiancheng BioengineeringInstitute (Jiangsu,  
26 China). The kits of superoxide dismutase (SOD), catalase (CAT), glutathione peroxidase (GSH-  
27 PX), glutathione reductase (GSH) and malonaldehyde (MDA) were acquired from Nanjing  
28 Jiancheng Bio-engineering Institute (Jiangsu, China). ELISA kits for the determination of tumor  
29 necrosis factor (TNF)- $\alpha$ ; interleukin-1 $\beta$  (IL-1 $\beta$ ); interleukin (IL)-6; inducible nitric oxide synthase  
30 (iNOS) were purchased from Shanghai Yansheng Bio-Technology Co. Ltd (Shanghai, China). All  
31 the other reagents used were analytically pure and bought from Shanghai Zhenqi Chemical  
32 Reagent Co., Ltd. (Shanghai, China).

### 33 **Laboratory animals**

34 One hundred Kunming mice (male), weighing  $20 \pm 5$  g, were purchased from the Experimental  
35 Animal Center of Anhui Medical University (Certificate number: no. 1 license of the Medical  
36 Laboratory Animal of Anhui), and were kept under standard conditions, which include: 12 h  
37 light/dark cycle, temperature: 18–20 °C and a standard diet. This project was reviewed and  
38 approved by the Committee for Protection of Animal Care Committee at the Hefei University of  
39 Technology.

### 40 **Cell culture and cytotoxicity of LIM**

41 MTT test was performed on HepG2 cells which were seeded at  $1 \times 10^5$  cells/well in 96-well plates  
42 and maintained at 37 °C in an atmosphere of 5% CO<sub>2</sub> and DMEM supplemented with 1%  
43 penicillin-streptomycin solution and 10% fetal bovine serum. The LIM were dissolved in  
44 phosphate buffered saline solution. Then the LIM at different concentrations (300, 150, 100, 50,

45 10, 5 and 1  $\mu\text{g/mL}$ ) were used and phosphate buffered saline was used as control group. Cells  
46 were incubated with LIM solution. After 24 h incubation, cells were incubated with 5 mg/mL  
47 MTT solution for 4 h in a  $\text{CO}_2$  incubator to allow the transformation of MTT dye to formazan salt.  
48 After 4 h, the medium was removed, then 150  $\mu\text{l}$  dimethyl sulfoxide was added and incubated for  
49 10 min at 37  $^\circ\text{C}$ . The optical density at 490 nm was measured by microplate reader (Bio-Rad  
50 iMark).<sup>2,3</sup>

### 51 **Animal grouping and experiment design**

52 After acclimatization for one week, 10 of the 100 healthy male Kunming mice were selected  
53 randomly as the normal group (control) and later intragastrically administered with normal saline  
54 at the ratio of 10 mL/kg. According to A. Nemmar's previous report with slight modification,<sup>4</sup>  
55 adenine-enriched diet (containing 10 g adenine per kg feed) administration was adopted for 3  
56 weeks to build the CRF mice model. Then SCR and BUN concentrations in serum on the mice  
57 were measured. Mice reached modeling requirements (SCR>115 mM/L and BUN>8.05 mM/L)  
58 were randomly divided into 6 groups (10 mice per group), including no drug treatment model  
59 control (normal saline: 10 mL/kg), HC alone positive control (HC: 150 mg/kg), low dose LIM  
60 alone (LIM: 100 mg/kg), high dose LIM alone (LIM: 200 mg/kg), low dose LIM plus HC (LIM:  
61 100 mg/kg; HC: 150 mg/kg) , and high dose LIM plus HC (LIM: 200 mg/kg; HC: 150 mg/kg) ,  
62 respectively. All supplements were freshly prepared every day and intragastric administration was  
63 performed once a day for 4 successive weeks. The mice were weighed before the beginning of the  
64 treatment weekly during the treatment period. And doses were administered once a day and  
65 adjusted based on the body weight.

66 **statement**

67 The study was approved by the Committee for the Protection of Animal Care Committee at the  
68 Hefei University of Technology. All experimental protocols were in accordance to the Guidelines  
69 of Experimental Animal Administration published by the State Committee of Science and  
70 Technology of People's Republic of China.

### 71 **Sample collection**

72 At the end of the experimental period, the mice were fasted for 12 h after the last treatment  
73 administration. Before the cervical dislocation of the mice, blood was sampled from the mice eyes  
74 and kept at room temperature for half an hour while it coagulated naturally. Serum was obtained  
75 from blood samples after being centrifuged at 10 000g for 10 min at 4 °C and were stored at -80  
76 °C prior to analysis. The kidneys were removed and weighed which were homogenated along with  
77 0.9% normal saline at a rate of 1 g:10 mL (weight: volume), and then stored at -80 °C for future  
78 analyses.

### 79 **Determination of blood biochemical indexes of mice with CRF**

80 The levels of BUN, SCR, TP and ALB in serum were determined using test kits, with diacetyl  
81 oxime method, picric acid colorimetric method, coomassie brilliant blue method and bromocresol  
82 green colorimetric method respectively according to the kit instructions.

### 83 **Determination of weight growth rate and kidney index**

84 Food intake, water consumption, furs, and movement of mice were monitored during the  
85 experiments. Body weights were measured initially and 24 h after the last drug dosage. Kidneys

86 were dissected and weighed, and then the kidneys index was calculated as: kidneys weight/body  
87 weight  $\times$  100%.<sup>5</sup>

#### 88 **Determination of antioxidant indicator of the kidney tissue homogenate**

89 For examining treatment effects on oxidative stress, SOD, CAT, GSH-PX, GSH levels and the  
90 MDA concentrations in the kidney homogenate solution were determined with hydroxylamine  
91 method, visible spectrometry method, colorimetric method, colorimetric method, and  
92 thiobarbituric acid method respectively according to the kit instructions. About the hydroxylamine  
93 method, the final product of oxyhydroxylation of .O<sub>2</sub> is nitrite, and the latter under the action of  
94 sulfanilic acid and methyl naphthylamine present purple, the maximum absorption peak at a  
95 wavelength of 530 nm, it determined by spectrophotometer. The visible spectrometry is a very  
96 popular method. The colorimetric method for GSH-PX is due to GSH-PX can promote the  
97 reaction of hydrogen peroxide with reduced glutathione to produce H<sub>2</sub>O and oxidized glutathione,  
98 so the activity of enzyme is obtained. Finally, the colorimetric method for GSH is due to GSH and  
99 2-thio acid of nitrobenzene were used to produce 5-thio acid of two nitrobenzene anion, which  
100 showed a stable yellow. The absorbance of GSH could be calculated by measuring the absorbance  
101 at 412 nm.

#### 102 **Determination of cytokine production of the kidney tissue homogenate**

103 Nephridial levels of TNF- $\alpha$ , IL-1 $\beta$ , IL-6, and activities of iNOS were analyzed using kits  
104 according to the manufacturer's protocols.

#### 105 **Histological analysis**

106 Kidney samples were collected and fixed in 10% neutral buffered formalin, embedded in paraffin,  
107 followed by Haematoxylin and Eosin dyeing, and finally observed and imaged under an optical  
108 microscope.

#### 109 **Statistical analysis**

110 All data were presented as mean  $\pm$  standard deviation after being statistically processed. Software  
111 SPSS 13.0 was used for t-test analysis of the inter group deviation.  $p < 0.05$  means significant  
112 difference while  $p < 0.01$  means very significant difference.

113

#### 114 **References**

- 115 1. Y. Lu, M. Ye, S. Song and L. Li, *Appl. Biochem. Biotec.*, 2014, **174**, 762-71.
- 116 2. R. Shinkai, M. L. Grossi and E. R. Teixeira, *Or. Surg. Or. Med. Or. Pa.*, 2014, **117**, 423-8.
- 117 3. R. M. Liu, X. J. Zhang, G. Y. Liang and Y. F. Yang, *Bmc Complem. Altern.*, 2015, **15**, 1-1.
- 118 4. B. Ali, A. Ziada, I. A. Husseni, S. Beegam and A. Nemmar, *Toxicol. Lett.*, 2010, **196**, 107-  
119 112.
- 120 5. X. Feng, X. M. Qiu, Y. L. Huang and X. Z. Liu, *Food Sci.*, 2010, **9**, 064.
